# Supplementary material
Source: MDPI journal article supplement (https://www.mdpi.com/2227-9040/10/2/62)
Supplement: s1 [file s1 › chemosensors-1534865-supplementary.pdf]

## Supplementary Data

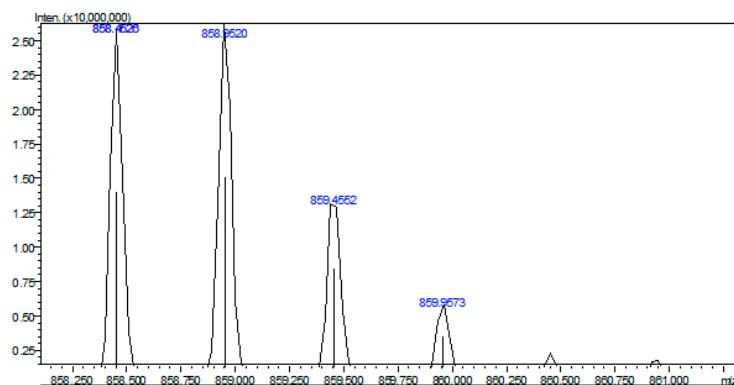

**Figure S1.** LCMS mass spectrum of synthesized PCDA-Gly-Gly-Ser-Gly-Tyr-Pro-Tyr-Asp-Val-Pro-Asp-Tyr-Ala amphiphile which bears the HA epitope. The calculated  $m/z$  for this product is 1716.98 (for single charge ion peak) or 858.49 (for double charged ion peak), where the double peak can be observed in the mass spectrum.

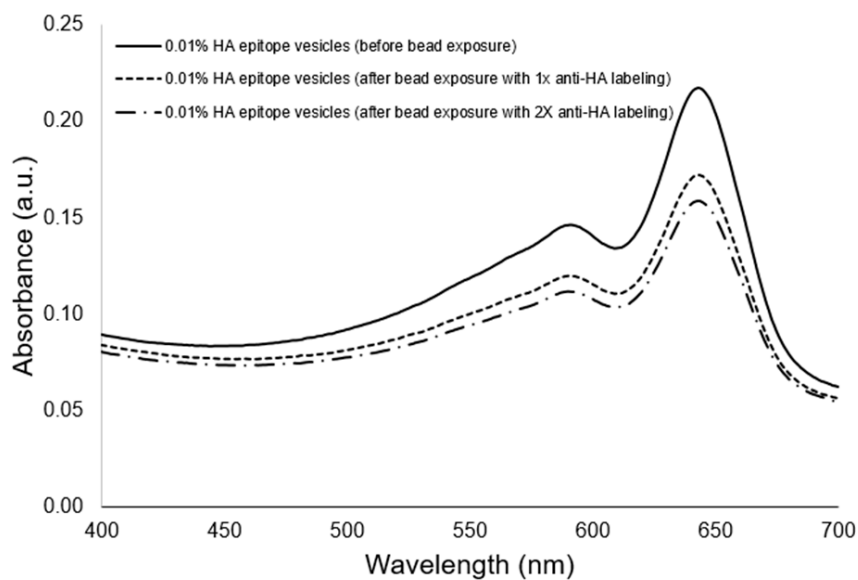

**Figure S2.** Absorption spectra of 0.01% HA epitope displaying vesicles before and after exposure to anti-HA beads produced from magnetic protein A/G beads non-covalently labeled with anti-HA antibody.

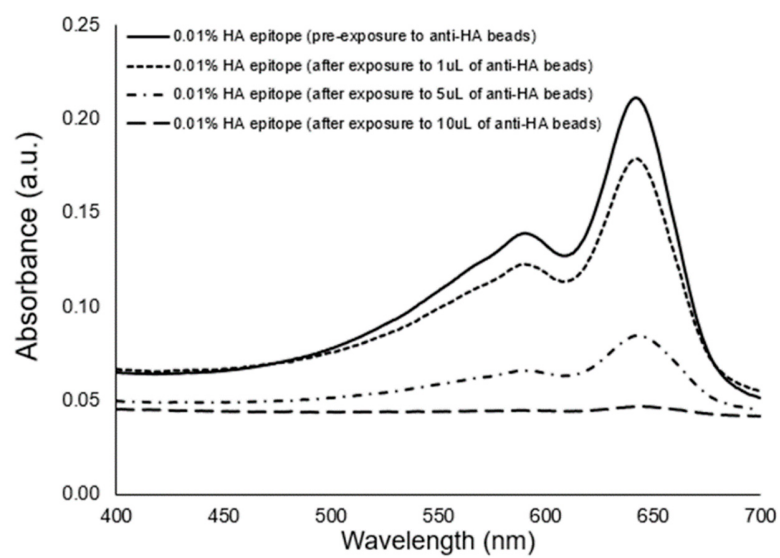

**Figure S3.** Absorption spectra of 0.01% HA epitope displaying vesicles showing comparison of clearance of vesicles as a function of anti-HA bead concentration.

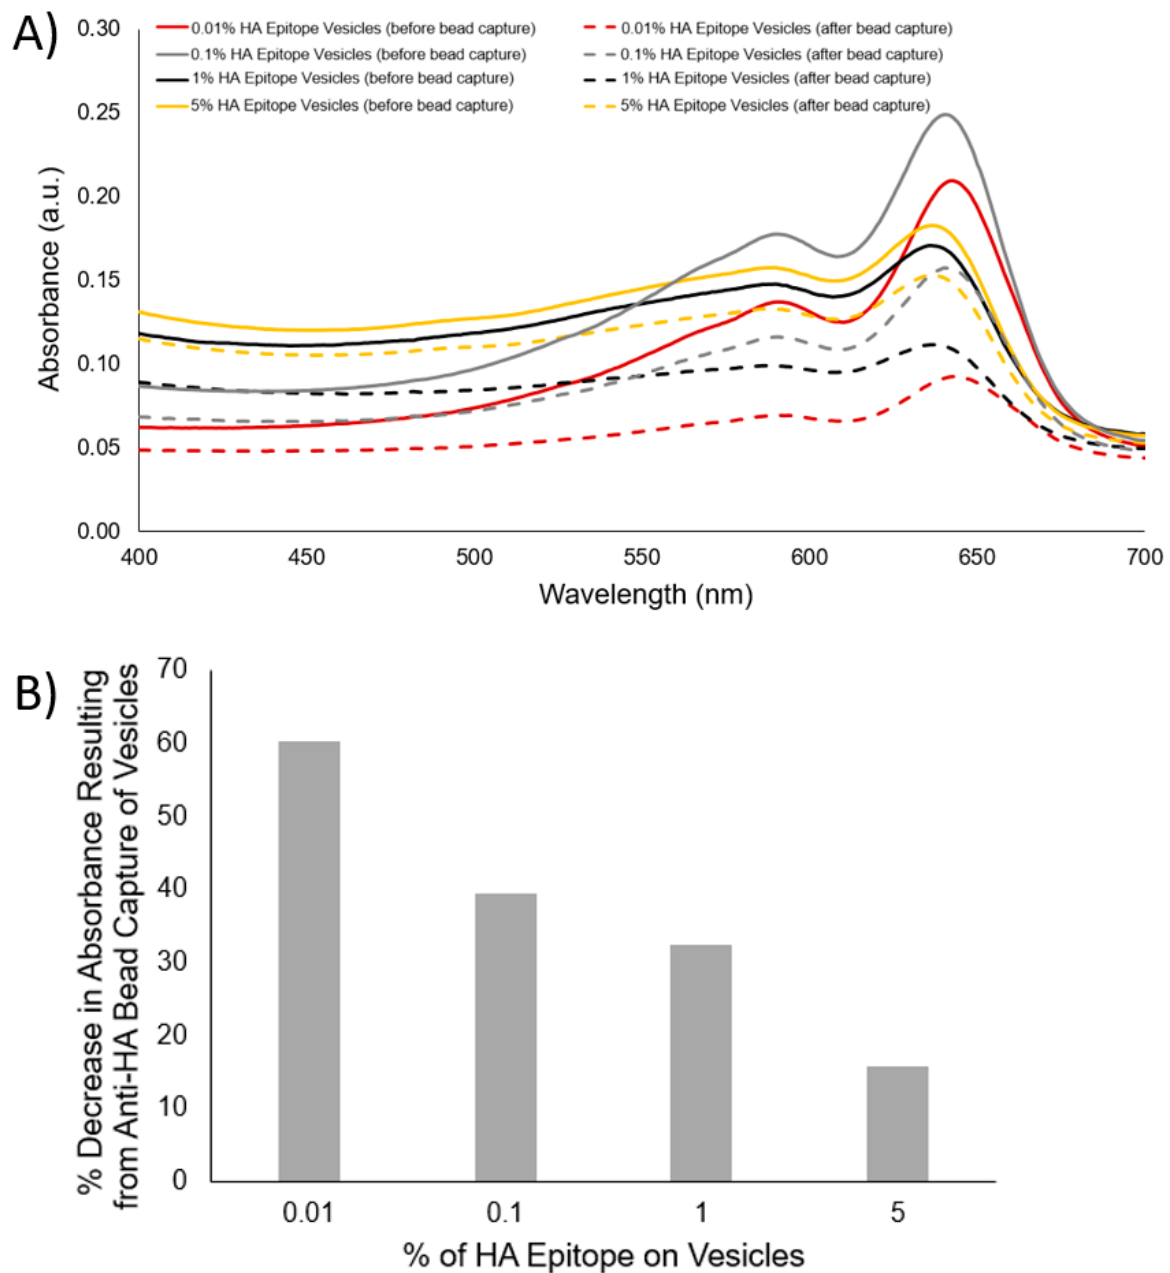

**Figure S4.** (A) Absorption spectra of vesicle suspension before and after exposure to 5 $\mu$ L of anti-HA beads for vesicles displaying different percentages of HA epitope. (B) Comparison of attenuation in signal resulting from vesicle capture by the anti-HA beads as a function of the different vesicle compositions (percentages of displayed HA epitope).
